# Supplementary material for: A Linked Electronic Medical Record-Claims Analysis of the Clinical and Economic Outcomes of Patients Coded for Erosive Esophagitis in the United States
Source: Springer Nature journal article supplement (doi:10.1007/s12325-023-02688-7), 2023-10-14

**Electronic Supplementary Material for:** A Linked Electronic Medical Record-Claims Analysis of the Clinical and Economic Outcomes of Erosive Esophagitis in the United States

**In:** Advances in Therapy

**Authors:** Rena Yadlapati, MD,<sup>1\*</sup> Katherine Cappell, PhD,<sup>2</sup> Robert Sedgley, BS,<sup>2</sup> Corey Pelletier, PhD,<sup>3</sup> Rinu Jacob, PharmD,<sup>3</sup> Machaon Bonafede, PhD,<sup>2</sup> and Shailja C. Shah, MD, MPH,<sup>1,4</sup>

**Affiliation:** 1 Division of Gastroenterology, University of California, San Diego, CA, USA; 2 Real World Evidence, Veradigm, Chicago, IL, USA; 3 Medical Affairs, Phathom Pharmaceuticals, Florham Park, NJ, USA; 4 GI Section, VA San Diego Healthcare System, San Diego, CA, USA;

\* **corresponding author:** ryadlapati@health.ucsd.edu

Table S1. Codes Used in Study Execution

Table S2. Demographic and Clinical Characteristics of All Cohorts

Table S3. Full Unadjusted Annualized<sup>a</sup> Healthcare Costs

Table S4. Sensitivity Analysis of Patients with Esophagogastroduodenoscopy (EGD) in the Baseline Period

Figure S1. Sankey Diagram of the First Four Lines of Therapy

Table S1. Codes Used in Study Execution

| Category                    | Description                      | Code Type | Code <sup>a</sup>                                                                                                                                                                                                                                                                                                                                                                                                                                                                                                                             |
|-----------------------------|----------------------------------|-----------|-----------------------------------------------------------------------------------------------------------------------------------------------------------------------------------------------------------------------------------------------------------------------------------------------------------------------------------------------------------------------------------------------------------------------------------------------------------------------------------------------------------------------------------------------|
| Inclusion Criteria          | GERD with esophagitis            | ICD-10-CM | K21.0*                                                                                                                                                                                                                                                                                                                                                                                                                                                                                                                                        |
| General Clinical Conditions | Abdominal pain and/or tenderness | ICD-9-CM  | 789.0x, 789.6x                                                                                                                                                                                                                                                                                                                                                                                                                                                                                                                                |
|                             |                                  | ICD-10-CM | R10.0, R10.1*, R10.3*, R10.8*, R10.9                                                                                                                                                                                                                                                                                                                                                                                                                                                                                                          |
|                             | Anxiety                          | ICD-9-CM  | 300.0x, 300.2x, 300.3, 300.4, 300.5, 300.6, 300.7                                                                                                                                                                                                                                                                                                                                                                                                                                                                                             |
|                             |                                  | ICD-10-CM | F40*, F41*, F42*, F43*                                                                                                                                                                                                                                                                                                                                                                                                                                                                                                                        |
|                             | Asthma                           | ICD-9-CM  | 493.x                                                                                                                                                                                                                                                                                                                                                                                                                                                                                                                                         |
|                             |                                  | ICD-10-CM | J45*                                                                                                                                                                                                                                                                                                                                                                                                                                                                                                                                          |
|                             | Cancer (any)                     | ICD-9-CM  | 140.x, 141.x, 142.x, 143.x, 144.x, 145.x, 146.x, 147.x, 148.x, 149.x, 150.x, 151.x, 152.x, 153.x, 154.x, 155.x, 156.x, 157.x, 158.x, 159.x, 160.x, 161.x, 162.x, 163.x, 164.x, 165.x, 170.x, 171.x, 172.x, 173.x, 174.x, 175.x, 176.x, 179, 180.x, 181, 182.x, 183.x, 184.x, 185, 186.x, 187.x, 188.x, 189.x, 190.x, 191.x, 192.x, 193, 194.x, 195.x, 196.x, 197.x, 198.x, 199.x, 200.x, 201.x, 202.x, 203.x, 204.x, 205.x, 206.x, 207.x, 208.x, 209.0x, 209.1x, 209.2x, 209.3x, 209.7x                                                       |
|                             |                                  | ICD-10-CM | C00*, C01, C02*, C03*, C04*, C05*, C06*, C07, C08*, C09*, C10*, C11*, C12, C13*, C14*, C15*, C16*, C17*, C18*, C19, C20, C21*, C22*, C23, C24*, C25*, C26*, C30*, C31*, C32*, C33, C34*, C37, C38*, C39*, C40*, C41*, C43*, C44*, C45*, C46*, C47*, C48*, C49*, C50*, C51*, C52, C53*, C54*, C55, C56*, C57*, C58, C60*, C61, C62*, C63*, C64*, C65*, C66*, C67*, C68*, C69*, C70*, C71*, C72*, C73, C74*, C75*, C7A*, C7B*, C76*, C77*, C78*, C79*, C80*, C81*, C82*, C83*, C84*, C85*, C86*, C88*, C90*, C91*, C92*, C93*, C94*, C95*, C96* |
|                             | Cardiovascular disease           | ICD-9-CM  | 390, 391.x, 392.x, 393, 394.x, 395.x, 396.x, 397.x, 398.x, 401.x, 402.x, 403.x, 404.x, 405.x, 410.x, 411.x, 412, 413.x, 414.x, 415.x, 416.x, 417.x, 420.x, 421.x, 422.x, 423.x, 424.x, 425.x, 426.x, 427.x, 428.x, 429.x, 430, 431, 432.x, 433.x, 434.x, 435.x, 436, 437.x, 438.x, 440.x, 441.x, 442.x, 443.x, 444.x, 445.x, 446.x, 447.x, 448.x, 449, 451.x, 452, 453.x, 454.x, 455.x, 456.x, 457.x, 458.x, 459.x                                                                                                                            |
|                             |                                  | ICD-10-CM | I05*, I06*, I07*, I08*, I09*, I10*, I11*, I12*, I13*, I15*, I16*, I20*, I21*, I22*, I23*, I24*, I25*, I26*, I27*, I28*, I30*, I31*, I32*, I33*, I34*, I35*, I36*, I37*, I38*, I39*, I40*, I41*, I42*, I43*, I44*, I45*, I46*, I47*, I48*, I49*, I50*, I51*, I52*, I60*, I61*, I62*, I63*, I65*, I66*, I67*, I68*, I69*, I70*, I71*, I72*, I73*, I74*, I75*, I76*, I77*, I78*, I79*, I80*, I81*, I82*, I83*, I85*, I86*, I87*, I88*, I89*, I95*, I96*, I97*, I99*                                                                              |
| Chest pain                  | ICD-9-CM                         | 786.5x    |                                                                                                                                                                                                                                                                                                                                                                                                                                                                                                                                               |

|                        |           |                                                                                                                                                                |
|------------------------|-----------|----------------------------------------------------------------------------------------------------------------------------------------------------------------|
|                        | ICD-10-CM | R07.1, R07.2, R07.8*, R07.9                                                                                                                                    |
| Chronic pain           | ICD-9-CM  | 338.2x, 338.4                                                                                                                                                  |
|                        | ICD-10-CM | G89.2*, G89.4                                                                                                                                                  |
| Depression             | ICD-9-CM  | 296.2x, 296.3x, 300.4, 309.0                                                                                                                                   |
|                        | ICD-10-CM | F32*, F33*, F43.1, F43.21, F53.0                                                                                                                               |
| Diabetes, type 1       | ICD-9-CM  | 250.01, 250.03, 250.11, 250.13, 250.21, 250.23, 250.31, 250.33, 250.41, 250.43, 250.51, 250.53, 250.61, 250.63, 250.71, 250.73, 250.81, 250.83, 250.91, 250.93 |
|                        | ICD-10-CM | E10*, O24.0x                                                                                                                                                   |
| Diabetes, type 2       | ICD-9-CM  | 250.00, 250.02, 250.10, 250.12, 250.20, 250.22, 250.30, 250.32, 250.40, 250.42, 250.50, 250.52, 250.60, 250.62, 250.70, 250.72, 250.80, 250.82, 250.90, 250.92 |
|                        | ICD-10-CM | E11*, O24.1*                                                                                                                                                   |
| Fatigue                | ICD-9-CM  | 780.71, 780.79                                                                                                                                                 |
|                        | ICD-10-CM | R53.82, R53.83                                                                                                                                                 |
| Hypercholesterolemia   | ICD-9-CM  | 272                                                                                                                                                            |
|                        | ICD-10-CM | E78.0*                                                                                                                                                         |
| Hyperlipidemia         | ICD-9-CM  | 272.2, 272.4                                                                                                                                                   |
|                        | ICD-10-CM | E78.2, E78.4* E78.5                                                                                                                                            |
| Hypertension (primary) | ICD-9-CM  | 401.x                                                                                                                                                          |
|                        | ICD-10-CM | I10                                                                                                                                                            |
| Hypothyroidism         | ICD-9-CM  | 243, 244.x                                                                                                                                                     |
|                        | ICD-10-CM | E00*, E01*. E02, E03*, E89.0                                                                                                                                   |
| Obesity diagnosis      | ICD-9-CM  | 278.x, 649.1x, V85.3x, V85.4x                                                                                                                                  |
|                        | ICD-10-CM | E66*, O99.2*, Z68.3*, Z68.4*,                                                                                                                                  |
| Opioid Use             | ICD-9-CM  | 304.0x, 305.5x                                                                                                                                                 |
|                        | ICD-10-CM | F11*                                                                                                                                                           |
| Osteoarthritis         | ICD-9-CM  | 715.x                                                                                                                                                          |
|                        | ICD-10-CM | M15*, M16*, M17*, M18*, M19*                                                                                                                                   |
| Shortness of breath    | ICD-9-CM  | 786.02, 786.05                                                                                                                                                 |
|                        | ICD-10-CM | R06.0*                                                                                                                                                         |
| Sleep disorder         | ICD-9-CM  | 78.5x                                                                                                                                                          |

|                          |                                              |                             |                                          |
|--------------------------|----------------------------------------------|-----------------------------|------------------------------------------|
|                          |                                              | ICD-10-CM                   | F51.8, F51.9, G47*                       |
| GI-related Comorbidities | Achalasia                                    | ICD-9-CM                    | 530                                      |
|                          |                                              | ICD-10-CM                   | K22.0                                    |
|                          | Aspiration pneumonia                         | ICD-9-CM                    | 507.x                                    |
|                          |                                              | ICD-10-CM                   | J69*                                     |
|                          | Barrett's esophagus                          | ICD-9-CM                    | 530.85                                   |
|                          |                                              | ICD-10-CM                   | K22.7*                                   |
|                          | Dyskinesia of Esophagus                      | ICD-9-CM                    | 530.5                                    |
|                          |                                              | ICD-10-CM                   | K22.4                                    |
|                          | Esophagogastric junction outflow obstruction | ICD-9-CM                    | 530.3                                    |
|                          |                                              | ICD-10-CM                   | K22.2                                    |
|                          | Foregut cancer                               | ICD-9-CM                    | 150.x, 151.x, 155.x, 156.x, 157.x, 159.1 |
|                          |                                              | ICD-10-CM                   | C15*, C16*, C22*, C23, C24*, C25*, C26.1 |
|                          | Gastroparesis                                | ICD-9-CM                    | 536.3                                    |
|                          |                                              | ICD-10-CM                   | K31.84                                   |
|                          | Helicobacter pylori                          | ICD-9-CM                    | 041.86                                   |
|                          |                                              | ICD-10-CM                   | B96.81                                   |
| Hiatal hernia            | ICD-9-CM                                     | 551.3, 552.3, 553.3         |                                          |
|                          | ICD-10-CM                                    | K44*                        |                                          |
| Peptic ulcer             | ICD-9-CM                                     | 530.2x, 531.x, 532.x, 533.x |                                          |
|                          | ICD-10-CM                                    | K25*, K26*, K27*, K21.1*,   |                                          |
| GI-related Symptom       | Chronic Cough                                | ICD-9-CM                    | 786.2                                    |
|                          |                                              | ICD-10-CM                   | R05.3                                    |
|                          | Chronic laryngitis                           | ICD-9-CM                    | 476.0                                    |
|                          |                                              | ICD-10-CM                   | J37.0                                    |
|                          | Dyspepsia, NOS                               | ICD-9-CM                    | 789.06                                   |
|                          |                                              | ICD-10-CM                   | R10.13                                   |
|                          | Dysphagia                                    | ICD-9-CM                    | 787.2x                                   |
|                          |                                              | ICD-10-CM                   | R131.1*                                  |
|                          | Functional dyspepsia                         | ICD-9-CM                    | 536.8                                    |

|            |                |           |                                                                                                                                                   |
|------------|----------------|-----------|---------------------------------------------------------------------------------------------------------------------------------------------------|
|            |                | ICD-10-CM | K30                                                                                                                                               |
|            | Heartburn      | ICD-9-CM  | 787.1                                                                                                                                             |
|            |                | ICD-10-CM | R12                                                                                                                                               |
| Procedures | Diagnostic EGD | CPT       | 43191, 43193, 43197, 43198, 43200, 43202, 43206, 43231, 43232, 43235, 43237, 43238, 43239, 43242, 43252, 43253, 43259, 0651T, 0652T, 0653T, 0654T |

CPT, Current Procedural Terminology; ICD-9-CM, International Classification of Diseases, 9th Edition, Clinical Modification; ICD-10-CDM, International Classification of Diseases, 10th Edition,

a For the code lists below, x is used as a wildcard for ICD-9 codes and \* is used as a wildcard for ICD-10 codes

Table S2. Demographic and Clinical Characteristics of All Cohorts

|                                         | <b>All EE Patients</b> |       | <b>0 PPI LOTs</b> |       | <b>1 PPI LOT</b> |       | <b>2 PPI LOTs</b> |       | <b>3+ PPI LOTs</b> |       |
|-----------------------------------------|------------------------|-------|-------------------|-------|------------------|-------|-------------------|-------|--------------------|-------|
|                                         | N = 158,347            |       | N = 56,275        |       | N = 71,958       |       | N = 14,985        |       | N = 15,129         |       |
| <b>Age, Index Date (Mean, SD)</b>       | 56.9                   | 14.3  | 57.4              | 14.5  | 57.0             | 14.2  | 55.8              | 14.4  | 56.1               | 14.0  |
| <b>Sex (N,%)</b>                        |                        |       |                   |       |                  |       |                   |       |                    |       |
| Male                                    | 61,583                 | 38.9% | 23,389            | 41.6% | 28,324           | 39.4% | 5,194             | 34.7% | 4,676              | 30.9% |
| Female                                  | 96,692                 | 61.1% | 32,857            | 58.4% | 43,601           | 60.6% | 9,787             | 65.3% | 10,447             | 69.1% |
| Unknown/Not Reported                    | 72                     | 0.0%  | 29                | 0.1%  | 33               | 0.0%  | 4                 | 0.0%  | 6                  | 0.0%  |
| <b>Race (N,%)</b>                       |                        |       |                   |       |                  |       |                   |       |                    |       |
| White                                   | 96,415                 | 60.9% | 34,285            | 60.9% | 44,945           | 62.5% | 8,782             | 58.6% | 8,403              | 55.5% |
| Black                                   | 10,922                 | 6.9%  | 3,725             | 6.6%  | 4,656            | 6.5%  | 1,123             | 7.5%  | 1,418              | 9.4%  |
| Asian                                   | 4,022                  | 2.5%  | 1,655             | 2.9%  | 1,550            | 2.2%  | 388               | 2.6%  | 429                | 2.8%  |
| Other                                   | 3,646                  | 2.3%  | 1,163             | 2.1%  | 1,614            | 2.2%  | 394               | 2.6%  | 475                | 3.1%  |
| Unknown/Not Reported                    | 43,342                 | 27.4% | 15,447            | 27.4% | 19,193           | 26.7% | 4,298             | 28.7% | 4,404              | 29.1% |
| <b>Ethnicity (N,%)</b>                  |                        |       |                   |       |                  |       |                   |       |                    |       |
| Hispanic                                | 11,469                 | 7.2%  | 3,264             | 5.8%  | 5,114            | 7.1%  | 1,364             | 9.1%  | 1,727              | 11.4% |
| Non-Hispanic                            | 129,671                | 81.9% | 46,938            | 83.4% | 58,793           | 81.7% | 12,025            | 80.2% | 11,915             | 78.8% |
| Unknown/Not Reported                    | 17,207                 | 10.9% | 6,073             | 10.8% | 8,051            | 11.2% | 1,596             | 10.7% | 1,487              | 9.8%  |
| <b>Geographic Region (N,%)</b>          |                        |       |                   |       |                  |       |                   |       |                    |       |
| Northeast                               | 45,889                 | 29.0% | 16,399            | 29.1% | 21,125           | 29.4% | 4,310             | 28.8% | 4,055              | 26.8% |
| Midwest                                 | 26,332                 | 16.6% | 8,286             | 14.7% | 13,118           | 18.2% | 2,572             | 17.2% | 2,356              | 15.6% |
| South                                   | 61,920                 | 39.1% | 23,105            | 41.1% | 26,694           | 37.1% | 5,809             | 38.8% | 6,312              | 41.7% |
| West                                    | 20,275                 | 12.8% | 7,109             | 12.6% | 9,302            | 12.9% | 1,902             | 12.7% | 1,962              | 13.0% |
| Other/Unknown                           | 3,931                  | 2.5%  | 1,376             | 2.4%  | 1,719            | 2.4%  | 392               | 2.6%  | 444                | 2.9%  |
| <b>Body Mass Index (BMI) (Mean, SD)</b> |                        |       |                   |       |                  |       |                   |       |                    |       |
| <18.5 (underweight)                     | 29,739                 | 18.8% | 11,329            | 20.1% | 12,959           | 18.0% | 2,742             | 18.3% | 2,709              | 17.9% |
| 18.5-24.9 (healthy weight)              | 47,943                 | 30.3% | 17,529            | 31.1% | 21,723           | 30.2% | 4,386             | 29.3% | 4,305              | 28.5% |
| 25.0-29.9 (overweight)                  | 63,926                 | 40.4% | 21,019            | 37.4% | 30,031           | 41.7% | 6,314             | 42.1% | 6,562              | 43.4% |
| ≥30 (obese)                             | 14,703                 | 9.3%  | 5,637             | 10.0% | 6,395            | 8.9%  | 1,337             | 8.9%  | 1,334              | 8.8%  |

|                                                                          | <b>All EE Patients</b> |       | <b>0 PPI LOTs</b> |       | <b>1 PPI LOT</b> |       | <b>2 PPI LOTs</b> |       | <b>3+ PPI LOTs</b> |       |
|--------------------------------------------------------------------------|------------------------|-------|-------------------|-------|------------------|-------|-------------------|-------|--------------------|-------|
|                                                                          | N = 158,347            |       | N = 56,275        |       | N = 71,958       |       | N = 14,985        |       | N = 15,129         |       |
| <b>General Clinical Conditions in the 12 Month Baseline Period (N,%)</b> |                        |       |                   |       |                  |       |                   |       |                    |       |
| Opioid Use <sup>a</sup>                                                  | 53,322                 | 33.7% | 10,698            | 19.0% | 27,374           | 38.0% | 6,798             | 45.4% | 8,452              | 55.9% |
| Abdominal pain                                                           | 54,477                 | 34.4% | 15,187            | 27.0% | 24,621           | 34.2% | 6,607             | 44.1% | 8,062              | 53.3% |
| Chest pain                                                               | 36,624                 | 23.1% | 9,747             | 17.3% | 16,633           | 23.1% | 4,568             | 30.5% | 5,676              | 37.5% |
| Anxiety                                                                  | 37,665                 | 23.8% | 10,165            | 18.1% | 17,591           | 24.4% | 4,423             | 29.5% | 5,486              | 36.3% |
| Depression                                                               | 28,755                 | 18.2% | 7,396             | 13.1% | 13,567           | 18.9% | 3,336             | 22.3% | 4,456              | 29.5% |
| Cardiovascular disease                                                   | 96,301                 | 60.8% | 31,188            | 55.4% | 44,692           | 62.1% | 9,592             | 64.0% | 10,829             | 71.6% |
| Hypertension                                                             | 80,647                 | 50.9% | 25,663            | 45.6% | 37,625           | 52.3% | 8,060             | 53.8% | 9,299              | 61.5% |
| Shortness of breath                                                      | 28,106                 | 17.7% | 7,468             | 13.3% | 12,854           | 17.9% | 3,420             | 22.8% | 4,364              | 28.8% |
| Chronic pain                                                             | 16,601                 | 10.5% | 3,756             | 6.7%  | 7,810            | 10.9% | 2,013             | 13.4% | 3,022              | 20.0% |
| Osteoarthritis                                                           | 37,247                 | 23.5% | 10,810            | 19.2% | 17,569           | 24.4% | 3,951             | 26.4% | 4,917              | 32.5% |
| Hyperlipidemia                                                           | 68,674                 | 43.4% | 22,010            | 39.1% | 32,134           | 44.7% | 6,879             | 45.9% | 7,651              | 50.6% |
| Diabetes (Type I or Type II)                                             | 36,624                 | 23.1% | 11,225            | 19.9% | 16,991           | 23.6% | 3,725             | 24.9% | 4,683              | 31.0% |
| Asthma                                                                   | 22,531                 | 14.2% | 6,299             | 11.2% | 10,351           | 14.4% | 2,534             | 16.9% | 3,347              | 22.1% |
| Sleep disorder                                                           | 31,866                 | 20.1% | 9,397             | 16.7% | 14,896           | 20.7% | 3,453             | 23.0% | 4,120              | 27.2% |
| Obesity (diagnosis or BMI $\geq$ 30)                                     | 73,809                 | 46.6% | 23,840            | 42.4% | 34,669           | 48.2% | 7,406             | 49.4% | 7,894              | 52.2% |
| Fatigue                                                                  | 27,628                 | 17.4% | 8,218             | 14.6% | 12,663           | 17.6% | 3,134             | 20.9% | 3,613              | 23.9% |
| Hypothyroidism                                                           | 29,987                 | 18.9% | 9,746             | 17.3% | 13,730           | 19.1% | 3,119             | 20.8% | 3,392              | 22.4% |
| Hypercholesterolemia                                                     | 24,932                 | 15.7% | 8,126             | 14.4% | 11,420           | 15.9% | 2,501             | 16.7% | 2,885              | 19.1% |
| Cancer (any)                                                             | 15,844                 | 10.0% | 5,705             | 10.1% | 7,252            | 10.1% | 1,452             | 9.7%  | 1,435              | 9.5%  |
| <b>GI-related Comorbidities in the 36 Month Follow-up Period (N,%)</b>   |                        |       |                   |       |                  |       |                   |       |                    |       |
| Hiatal hernia                                                            | 50,575                 | 31.9% | 14,437            | 25.7% | 23,502           | 32.7% | 5,868             | 39.2% | 6,768              | 44.7% |
| Peptic ulcer                                                             | 19,879                 | 12.6% | 4,709             | 8.4%  | 9,220            | 12.8% | 2,645             | 17.7% | 3,305              | 21.8% |
| Barrett's esophagus                                                      | 19,232                 | 12.1% | 5,690             | 10.1% | 9,463            | 13.2% | 1,958             | 13.1% | 2,121              | 14.0% |
| Esophagogastric junction outflow obstruction                             | 13,923                 | 8.8%  | 3,894             | 6.9%  | 6,577            | 9.1%  | 1,648             | 11.0% | 1,804              | 11.9% |
| Helicobacter pylori                                                      | 6,219                  | 3.9%  | 1,417             | 2.5%  | 2,654            | 3.7%  | 852               | 5.7%  | 1,296              | 8.6%  |
| Gastroparesis                                                            | 5,275                  | 3.3%  | 1,104             | 2.0%  | 2,252            | 3.1%  | 743               | 5.0%  | 1,176              | 7.8%  |

|                                                                   | <b>All EE Patients</b> |       | <b>0 PPI LOTs</b> |       | <b>1 PPI LOT</b> |       | <b>2 PPI LOTs</b> |       | <b>3+ PPI LOTs</b> |       |
|-------------------------------------------------------------------|------------------------|-------|-------------------|-------|------------------|-------|-------------------|-------|--------------------|-------|
|                                                                   | N = 158,347            |       | N = 56,275        |       | N = 71,958       |       | N = 14,985        |       | N = 15,129         |       |
| Dyskinesia of Esophagus                                           | 3,774                  | 2.4%  | 838               | 1.5%  | 1,691            | 2.3%  | 510               | 3.4%  | 735                | 4.9%  |
| Aspiration pneumonia                                              | 2,123                  | 1.3%  | 503               | 0.9%  | 929              | 1.3%  | 292               | 1.9%  | 399                | 2.6%  |
| Foregut cancer <sup>1</sup>                                       | 1,646                  | 1.0%  | 447               | 0.8%  | 714              | 1.0%  | 228               | 1.5%  | 257                | 1.7%  |
| Achalasia                                                         | 943                    | 0.6%  | 227               | 0.4%  | 408              | 0.6%  | 122               | 0.8%  | 186                | 1.2%  |
| <b>GI-related Symptoms in the 36 Month Follow-up Period (N,%)</b> |                        |       |                   |       |                  |       |                   |       |                    |       |
| Dyspepsia                                                         | 39,162                 | 24.7% | 9,800             | 17.4% | 17,237           | 24.0% | 5,262             | 35.1% | 6,863              | 45.4% |
| Dysphagia                                                         | 37,112                 | 23.4% | 10,404            | 18.5% | 16,947           | 23.6% | 4,470             | 29.8% | 5,291              | 35.0% |
| Heartburn                                                         | 19,581                 | 12.4% | 5,489             | 9.8%  | 8,885            | 12.3% | 2,354             | 15.7% | 2,853              | 18.9% |
| Functional dyspepsia                                              | 11,424                 | 7.2%  | 3,168             | 5.6%  | 4,753            | 6.6%  | 1,490             | 9.9%  | 2,013              | 13.3% |
| Chronic cough                                                     | 9,845                  | 6.2%  | 3,230             | 5.7%  | 4,535            | 6.3%  | 1,006             | 6.7%  | 1,074              | 7.1%  |
| Chronic laryngitis                                                | 1,877                  | 1.2%  | 583               | 1.0%  | 787              | 1.1%  | 229               | 1.5%  | 278                | 1.8%  |

EE, Erosive esophagitis; LOT, line of therapy; PPI, proton pump inhibitor; SD, standard deviation



Table S3. Full Unadjusted Annualized<sup>a</sup> Healthcare Costs

|                                                   | <b>All EE Patients</b> |          | <b>0 PPI LOTs</b> |          | <b>1 PPI LOT</b> |          | <b>2 PPI LOTs</b> |          | <b>3+ PPI LOTs</b> |          |
|---------------------------------------------------|------------------------|----------|-------------------|----------|------------------|----------|-------------------|----------|--------------------|----------|
|                                                   | N = 158,347            |          | N = 56,275        |          | N = 71,958       |          | N = 14,985        |          | N = 15,129         |          |
| <b>All-cause Healthcare Utilization and Costs</b> |                        |          |                   |          |                  |          |                   |          |                    |          |
| <b>Inpatient</b>                                  |                        |          |                   |          |                  |          |                   |          |                    |          |
| Had an admission (N,%)                            | 42,394                 | 26.8%    | 11,555            | 20.5%    | 19,732           | 27.4%    | 4,978             | 33.2%    | 6,129              | 40.5%    |
| Number of admissions (Mean, SD)                   | 0.19                   | 0.55     | 0.12              | 0.4      | 0.19             | 0.54     | 0.25              | 0.6      | 0.38               | 0.89     |
| Length of stay per admission (Mean, SD)           | 5.0                    | 7.4      | 5.0               | 8.2      | 4.9              | 5.2      | 5.1               | 9.3      | 5.2                | 9.8      |
| Inpatient costs (Mean, SD)                        | \$3,734                | \$44,848 | \$2,552           | \$34,092 | \$3,809          | \$47,422 | \$5,423           | \$66,294 | \$6,105            | \$40,812 |
| <b>Emergency Department (ED)</b>                  |                        |          |                   |          |                  |          |                   |          |                    |          |
| Had an ED visit (N,%)                             | 81,993                 | 51.8%    | 24,242            | 43.1%    | 37,893           | 52.7%    | 9,186             | 61.3%    | 10,672             | 70.5%    |
| Number of ED visits (Mean, SD)                    | 0.71                   | 2.0      | 0.41              | 1.1      | 0.68             | 1.9      | 0.98              | 2.2      | 1.70               | 4.0      |
| ED visit costs (Mean, SD)                         | \$1,006                | \$3,824  | \$543             | \$2,387  | \$989            | \$3,577  | \$1,365           | \$3,757  | \$2,453            | \$7,347  |
| <b>Office Visits</b>                              |                        |          |                   |          |                  |          |                   |          |                    |          |
| Had an office visit (N,%)                         | 157,178                | 99.3%    | 55,617            | 98.8%    | 71,531           | 99.4%    | 14,936            | 99.7%    | 15,094             | 99.8%    |
| Number of office visits (Mean, SD)                | 15.0                   | 14.7     | 12.2              | 13.0     | 15.3             | 14.6     | 17.7              | 15.4     | 21.4               | 17.5     |
| Office visit costs (Mean, SD)                     | \$4,010                | \$11,266 | \$3,011           | \$9,794  | \$4,186          | \$11,719 | \$4,950           | \$11,940 | \$5,955            | \$12,993 |
| Office visit costs (Median, IQR)                  | \$1,502                | \$3,094  | \$1,058           | \$2,181  | \$1,623          | \$3,190  | \$2,022           | \$3,955  | \$2,690            | \$4,855  |
| <b>Other Medical Services</b>                     |                        |          |                   |          |                  |          |                   |          |                    |          |
| Had an other medical service (N, %)               | 155,725                | 98.3%    | 54,749            | 97.3%    | 71,019           | 98.7%    | 14,884            | 99.3%    | 15,073             | 99.6%    |
| Number of other medical services (Mean, SD)       | 11.4                   | 24.3     | 8.1               | 18.0     | 11.4             | 23.4     | 14.2              | 27.5     | 20.5               | 38.8     |
| Other medical service costs (Mean, SD)            | \$5,976                | \$31,789 | \$4,565           | \$34,169 | \$6,024          | \$28,859 | \$7,624           | \$31,414 | \$9,357            | \$35,692 |
| Other medical service costs (Median, IQR)         | \$1,355                | \$3,164  | \$1,017           | \$2,403  | \$1,398          | \$3,159  | \$1,790           | \$3,990  | \$2,448            | \$5,506  |
| <b>Pharmacy</b>                                   |                        |          |                   |          |                  |          |                   |          |                    |          |
| Had a pharmacy claim (N,%)                        | 143,187                | 90.4%    | 42,126            | 74.9%    | 71,015           | 98.7%    | 14,933            | 99.7%    | 15,113             | 99.9%    |
| Number of pharmacy claims (Mean, SD)              | 31.3                   | 40.7     | 12.4              | 22.1     | 36.1             | 39.3     | 44.1              | 43.4     | 66.7               | 58.8     |
| Pharmacy costs (Mean, SD)                         | \$2,127                | \$36,278 | \$961             | \$33,469 | \$2,326          | \$40,518 | \$3,180           | \$36,828 | \$4,476            | \$21,081 |
| Pharmacy costs (Median, IQR)                      | \$208                  | \$1,077  | \$36              | \$281    | \$332            | \$1,350  | \$496             | \$1,911  | \$951              | \$3,291  |
| <b>Total</b>                                      |                        |          |                   |          |                  |          |                   |          |                    |          |
| Total healthcare costs (Mean, SD)                 | \$16,853               | \$70,507 | \$11,633          | \$61,903 | \$17,335         | \$73,357 | \$22,542          | \$86,999 | \$28,346           | \$66,488 |
| Total healthcare costs (Median, IQR)              | \$5,772                | \$12,527 | \$3,651           | \$8,030  | \$6,298          | \$12,790 | \$8,476           | \$16,499 | \$12,639           | \$23,440 |

|                                                    | <b>All EE Patients</b> |         | <b>0 PPI LOTs</b> |         | <b>1 PPI LOT</b> |         | <b>2 PPI LOTs</b> |         | <b>3+ PPI LOTs</b> |         |
|----------------------------------------------------|------------------------|---------|-------------------|---------|------------------|---------|-------------------|---------|--------------------|---------|
|                                                    | N = 158,347            |         | N = 56,275        |         | N = 71,958       |         | N = 14,985        |         | N = 15,129         |         |
| <b>EE-related Healthcare Utilization and Costs</b> |                        |         |                   |         |                  |         |                   |         |                    |         |
| <b>Inpatient</b>                                   |                        |         |                   |         |                  |         |                   |         |                    |         |
| Had an admission (N,%)                             | 1,520                  | 1.0%    | 262               | 0.5%    | 682              | 0.9%    | 227               | 1.5%    | 349                | 2.3%    |
| Number of admissions (Mean, SD)                    | 0.00                   | 0.04    | 0.00              | 0.0     | 0.00             | 0.0     | 0.01              | 0.0     | 0.01               | 0.1     |
| Length of stay per admission (Mean, SD)            | 6.5                    | 22.1    | 6.6               | 23.0    | 5.3              | 5.4     | 7.7               | 25.3    | 7.8                | 35.5    |
| Inpatient costs (Mean, SD)                         | \$28                   | \$2,803 | \$28              | \$3,508 | \$15             | \$735   | \$22              | \$1,015 | \$100              | \$5,730 |
| <b>Emergency Department (ED)</b>                   |                        |         |                   |         |                  |         |                   |         |                    |         |
| Had an ED visit (N,%)                              | 4,152                  | 2.6%    | 994               | 1.8%    | 1,783            | 2.5%    | 581               | 3.9%    | 794                | 5.2%    |
| Number of ED visits (Mean, SD)                     | 0.01                   | 0.1     | 0.01              | 0.1     | 0.01             | 0.1     | 0.02              | 0.1     | 0.03               | 0.1     |
| ED visit costs (Mean, SD)                          | \$24                   | \$370   | \$14              | \$327   | \$24             | \$338   | \$38              | \$565   | \$51               | \$412   |
| <b>Office Visits</b>                               |                        |         |                   |         |                  |         |                   |         |                    |         |
| Had an office visit (N,%)                          | 113,469                | 71.7%   | 38,531            | 68.5%   | 52,390           | 72.8%   | 11,107            | 74.1%   | 11,441             | 75.6%   |
| Number of office visits (Mean, SD)                 | 0.6                    | 0.8     | 0.5               | 0.7     | 0.6              | 0.8     | 0.6               | 1.0     | 0.7                | 1.0     |
| Office visit costs (Mean, SD)                      | \$179                  | \$1,385 | \$138             | \$1,853 | \$189            | \$942   | \$223             | \$1,142 | \$245              | \$1,335 |
| Office visit costs (Median, IQR)                   | \$33                   | \$117   | \$26              | \$90    | \$35             | \$124   | \$40              | \$148   | \$46               | \$169   |
| <b>Other Medical Services</b>                      |                        |         |                   |         |                  |         |                   |         |                    |         |
| Had an other medical service (N, %)                | 70,185                 | 44.3%   | 24,131            | 42.9%   | 31,686           | 44.0%   | 7,061             | 47.1%   | 7,307              | 48.3%   |
| Number of other medical services (Mean, SD)        | 0.3                    | 1.1     | 0.3               | 0.7     | 0.3              | 0.8     | 0.3               | 2.8     | 0.3                | 0.6     |
| Other medical service costs (Mean, SD)             | \$215                  | \$1,735 | \$200             | \$1,372 | \$208            | \$1,696 | \$241             | \$1,908 | \$278              | \$2,685 |
| <b>Pharmacy</b>                                    |                        |         |                   |         |                  |         |                   |         |                    |         |
| Had a pharmacy claim (N,%)                         | 92,689                 | 58.5%   | 0                 | 0.0%    | 63,380           | 88.1%   | 14,355            | 95.8%   | 14,954             | 98.8%   |
| Number of pharmacy claims (Mean, SD)               | 2.2                    | 3.2     | 0.0               | 0.0     | 2.9              | 3.3     | 3.4               | 3.2     | 5.5                | 3.9     |
| Pharmacy costs (Mean, SD)                          | \$76                   | \$466   | \$0               | \$0     | \$90             | \$498   | \$122             | \$462   | \$250              | \$905   |
| Pharmacy costs (Median, IQR)                       | \$0                    | \$19    |                   |         | \$3              | \$41    | \$11              | \$66    | \$31               | \$146   |
| <b>Total</b>                                       |                        |         |                   |         |                  |         |                   |         |                    |         |
| Total healthcare costs (Mean, SD)                  | \$523                  | \$3,659 | \$380             | \$4,233 | \$526            | \$2,182 | \$646             | \$2,641 | \$924              | \$6,609 |
| Total healthcare costs (Median, IQR)               | \$147                  | \$384   | \$90              | \$244   | \$166            | \$408   | \$221             | \$506   | \$300              | \$698   |

EE, Erosive esophagitis; IQR, interquartile range; LOT, line of therapy; PPI, proton pump inhibitor; SD, standard deviation

Table S4. Sensitivity Analysis of Patients with Esophagogastroduodenoscopy (EGD) in the Baseline Period

|                                           | EGD cohort |          |
|-------------------------------------------|------------|----------|
|                                           | N = 72,658 |          |
| <b>Age, Index Date (Mean, SD)</b>         | 56.2       | 13.8     |
| <b>Sex (N,%)</b>                          |            |          |
| Male                                      | 28,427     | 39.1%    |
| Female                                    | 44,199     | 60.8%    |
| Unknown/Not Reported                      | 32         | 0.0%     |
| <b>Lines of Therapy<sup>a</sup> (N,%)</b> |            |          |
| 0                                         | 23,322     | 32.1%    |
| 1                                         | 33,481     | 46.1%    |
| 2                                         | 7,739      | 10.7%    |
| 3+                                        | 8,116      | 11.2%    |
| <b>36M Follow-up costs, annualized</b>    | 72,658     | 1        |
| <b>Inpatient</b>                          | 72,658     | 1        |
| Had an admission (N,%)                    | 19,785     | 27.2%    |
| Number of admissions (Mean, SD)           | 0.19       | 0.6      |
| Length of stay per admission (Mean, SD)   | 4.9        | 6.3      |
| Total hospitalized days (Mean, SD)        | 1.0        | 3.9      |
| Inpatient costs (Mean, SD)                | \$4,021    | \$48,535 |
| <b>Emergency Department (ED)</b>          |            |          |
| Had an ED visit (N,%)                     | 37,873     | 52.1%    |
| Number of ED visits (Mean, SD)            | 0.73       | 2.2      |
| ED visit costs (Mean, SD)                 | \$1,072    | \$3,814  |
| ED visit costs (Median, IQR)              | \$46       | \$744    |
| <b>Office Visits</b>                      |            |          |
| Had an office visit (N,%)                 | 72,110     | 99.2%    |
| Number of office visits (Mean, SD)        | 15.3       | 14.7     |
| Office visit costs (Mean, SD)             | \$4,344    | \$11,711 |
| Office visit costs (Median, IQR)          | \$1,701    | \$3,464  |

|                                             |          |          |
|---------------------------------------------|----------|----------|
| <b>Other Medical Services</b>               |          |          |
| Had an other medical service (N, %)         | 72,167   | 99.3%    |
| Number of other medical services (Mean, SD) | 11.4     | 22.6     |
| Other medical service costs (Mean, SD)      | \$5,995  | \$26,666 |
| Other medical service costs (Median, IQR)   | \$1,597  | \$3,349  |
| <b>Pharmacy</b>                             |          |          |
| Had a pharmacy claim (N,%)                  | 65,944   | 90.8%    |
| Number of pharmacy claims (Mean, SD)        | 31.0     | 40.3     |
| Pharmacy costs (Mean, SD)                   | \$2,134  | \$34,588 |
| Pharmacy costs (Median, IQR)                | \$206    | \$1,066  |
| <b>Total</b>                                |          |          |
| Total healthcare costs (Mean, SD)           | \$17,565 | \$69,889 |
| Total healthcare costs (Median, IQR)        | \$6,359  | \$13,009 |

IQR, interquartile range; SD, standard deviation

Figure S1. Sankey Diagram of the First Four Lines of Therapy

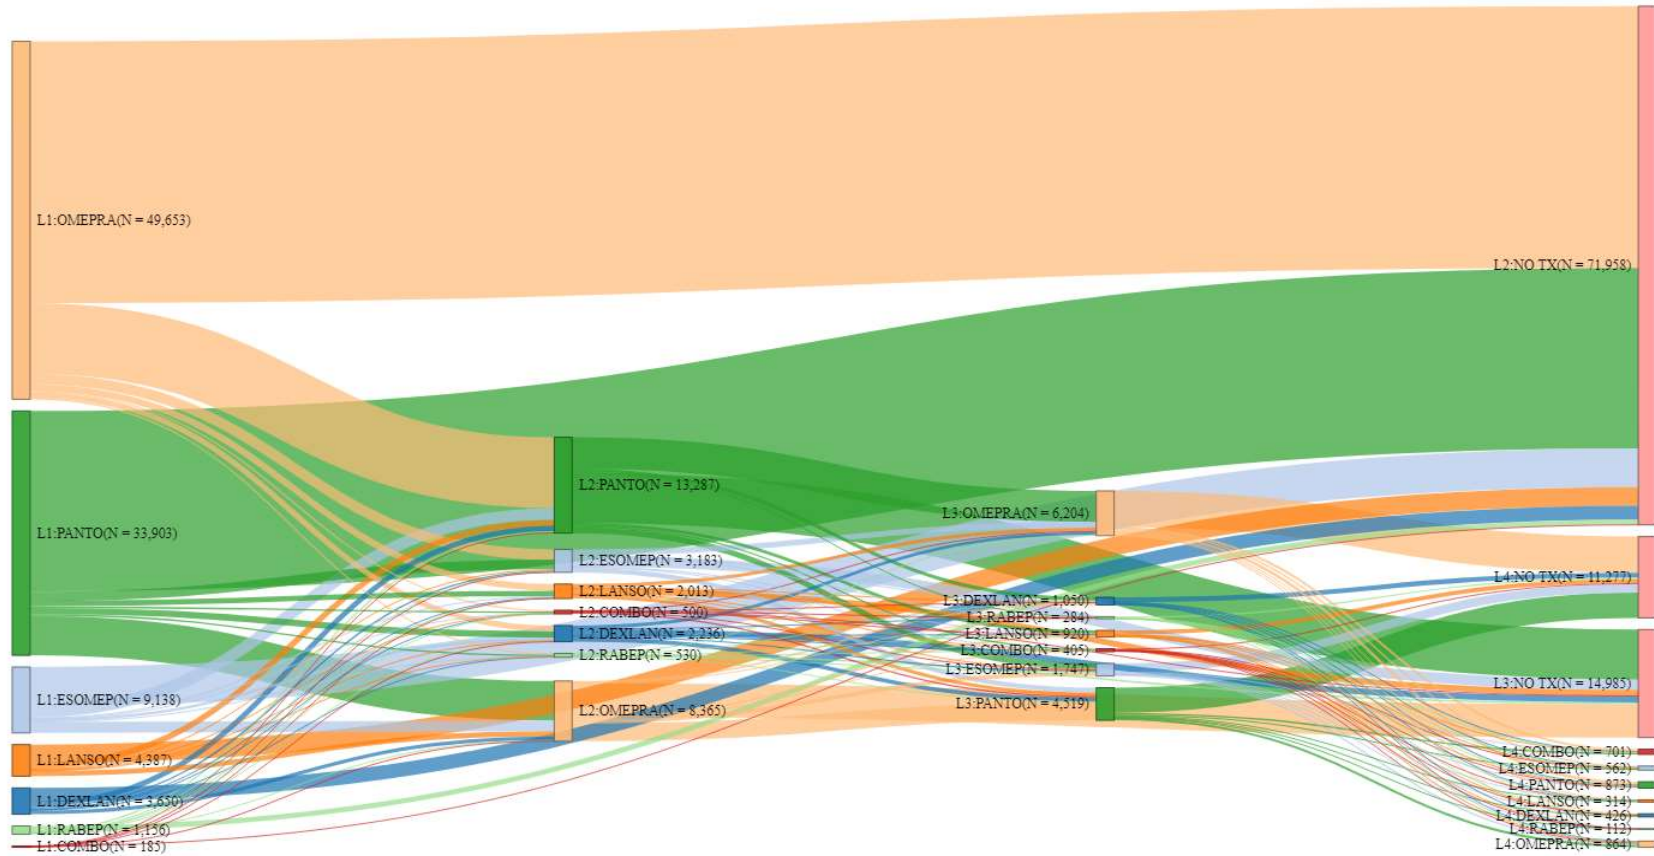

Supplement: MOESM1 [file 26181024]
